# Supplementary material
Source: MDPI journal article supplement (https://www.mdpi.com/2075-163X/12/7/862)
Supplement: s1 [file s1]

**Table S1.** Parameters of the adsorption equations.

| pH                              | Cs                                  | Cs                                         | Sr                                         |
|---------------------------------|-------------------------------------|--------------------------------------------|--------------------------------------------|
|                                 | Linear equation                     | Freundlich equation                        | Freundlich equation                        |
| Taganskoe deposit               |                                     |                                            |                                            |
| pH 3                            | $y = 0.26x + 3E-06$<br>$R^2 = 0.97$ |                                            | $n = 0.79$<br>$K_f = 0.06$<br>$R^2 = 0.86$ |
| pH 7                            |                                     | $n = 0.93$<br>$K_f = 0.31$<br>$R^2 = 0.98$ | $n = 0.72$<br>$K_f = 0.04$<br>$R^2 = 0.93$ |
| pH 10                           |                                     | $n = 0.90$<br>$K_f = 0.13$<br>$R^2 = 0.97$ | $n = 0.69$<br>$K_f = 0.03$<br>$R^2 = 0.93$ |
| Dash-Salakhinskoe deposit       |                                     |                                            |                                            |
| pH 3                            | $y = 0.17x + 2E-06$<br>$R^2 = 0.97$ |                                            | $n = 0.89$<br>$K_f = 0.06$<br>$R^2 = 0.97$ |
| pH 7                            |                                     | $n = 0.93$<br>$K_f = 0.21$<br>$R^2 = 0.92$ | $n = 0.77$<br>$K_f = 0.04$<br>$R^2 = 0.95$ |
| pH 10                           |                                     | $n = 0.79$<br>$K_f = 0.06$<br>$R^2 = 1$    | $n = 0.71$<br>$K_f = 0.03$<br>$R^2 = 0.95$ |
| Zyryanskoe deposit              |                                     |                                            |                                            |
| pH 3                            | $y = 0.16x + 3E-06$<br>$R^2 = 0.95$ |                                            | $n = 0.93$<br>$K_f = 0.07$<br>$R^2 = 0.94$ |
| pH 7                            |                                     | $n = 0.96$<br>$K_f = 0.24$<br>$R^2 = 0.99$ | $n = 0.81$<br>$K_f = 0.03$<br>$R^2 = 0.97$ |
| pH 10                           |                                     | $n = 0.77$<br>$K_f = 0.04$<br>$R^2 = 0.99$ | $n = 0.73$<br>$K_f = 0.02$<br>$R^2 = 0.96$ |
| 10 <sup>th</sup> Khutor deposit |                                     |                                            |                                            |
| pH 3                            | $y = 0.12x - 4E-06$<br>$R^2 = 0.98$ |                                            | $n = 1.03$<br>$K_f = 0.13$<br>$R^2 = 0.93$ |
| pH 7                            |                                     | $n = 1.01$<br>$K_f = 0.26$<br>$R^2 = 0.98$ | $n = 0.86$<br>$K_f = 0.05$<br>$R^2 = 0.93$ |
| pH 10                           |                                     | $n = 0.83$<br>$K_f = 0.04$<br>$R^2 = 0.99$ | $n = 0.75$<br>$K_f = 0.03$<br>$R^2 = 0.93$ |

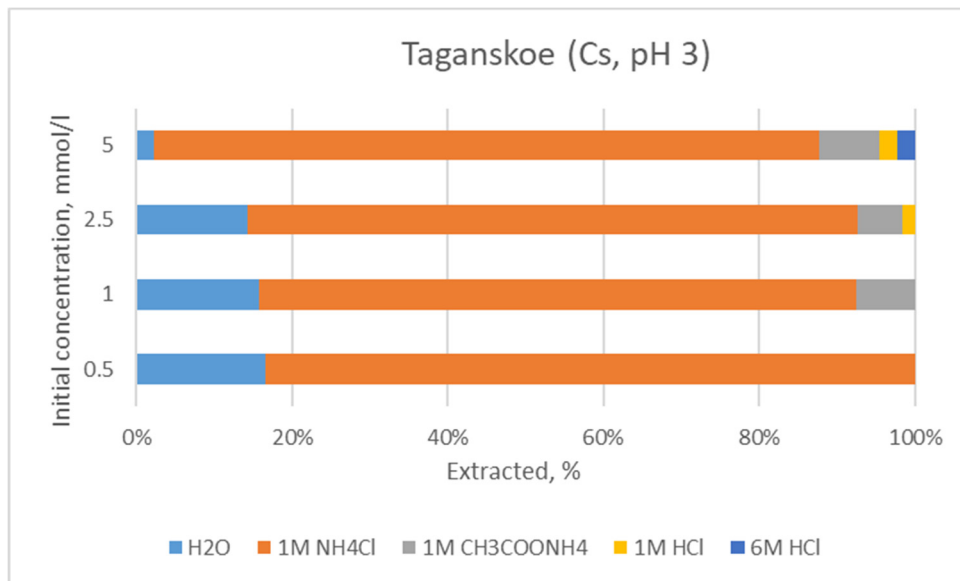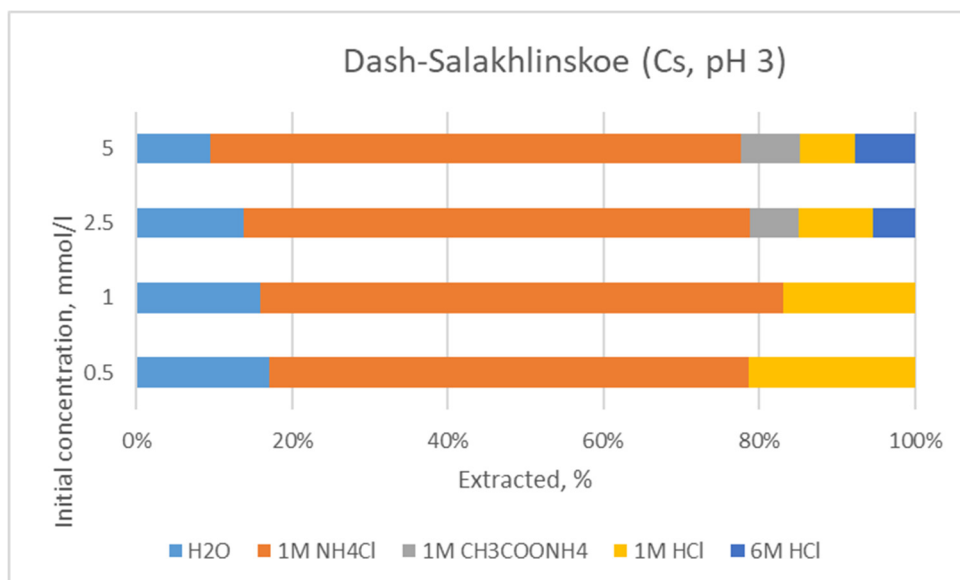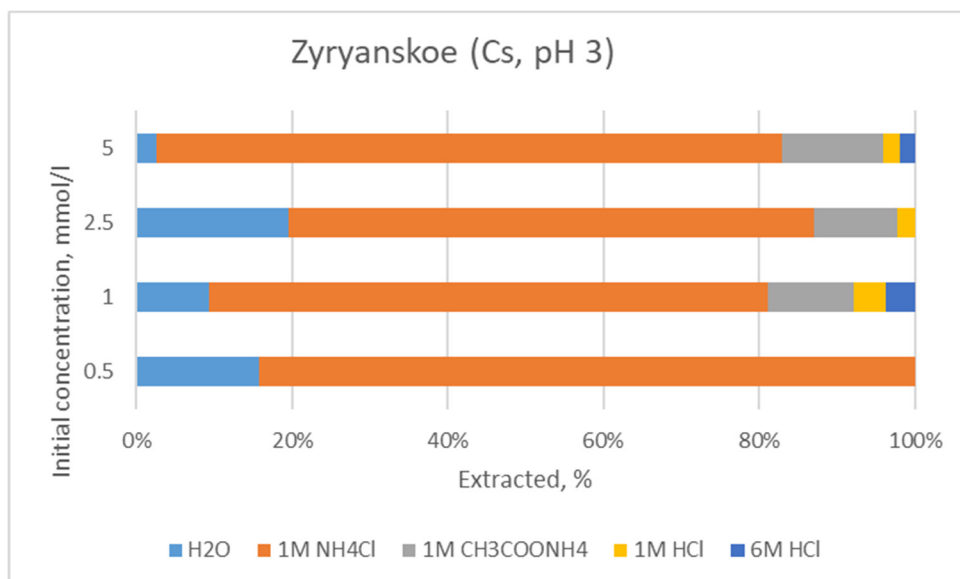

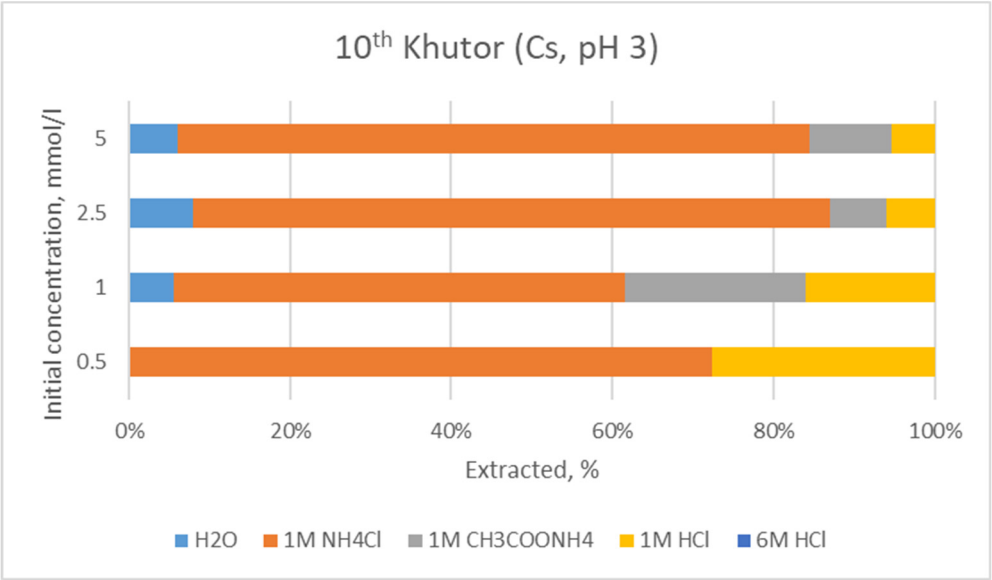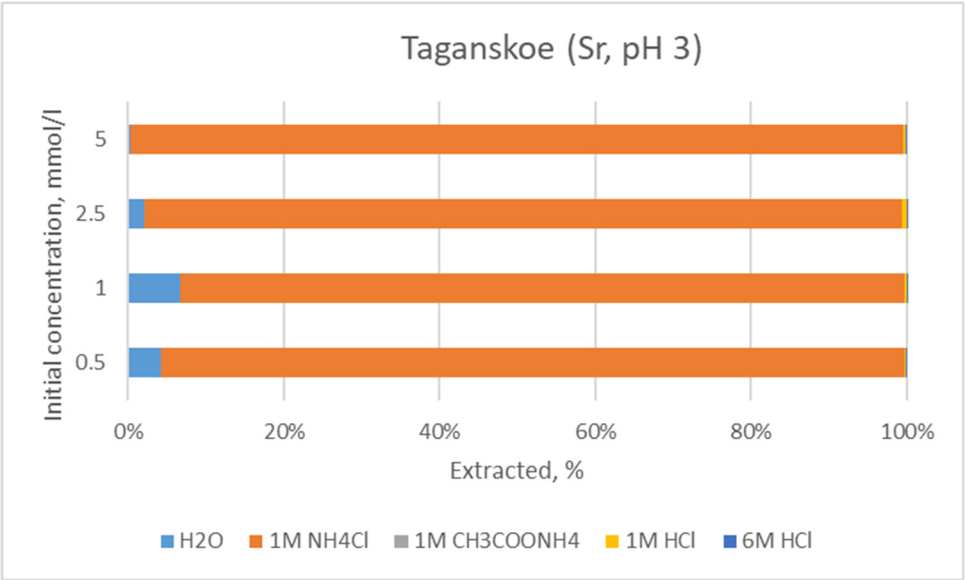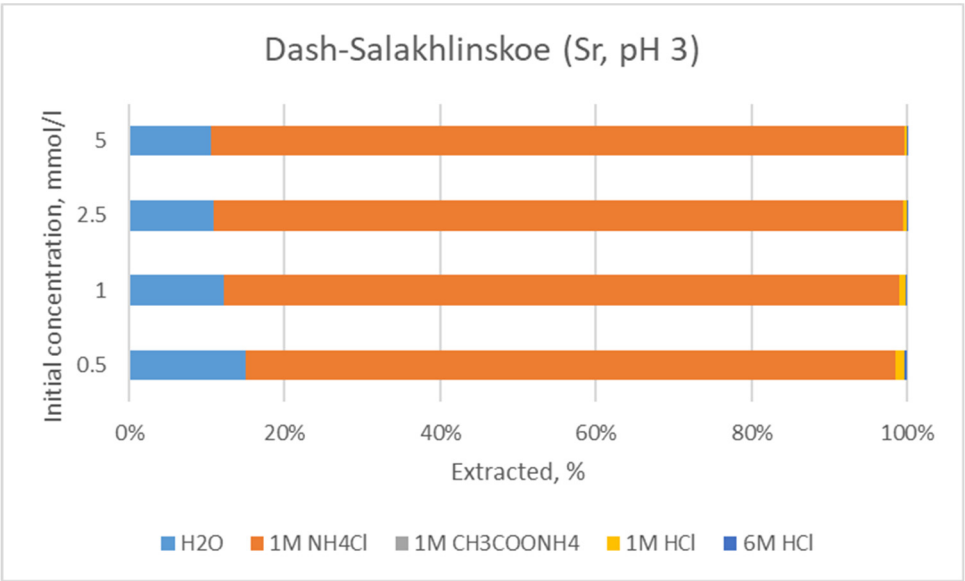

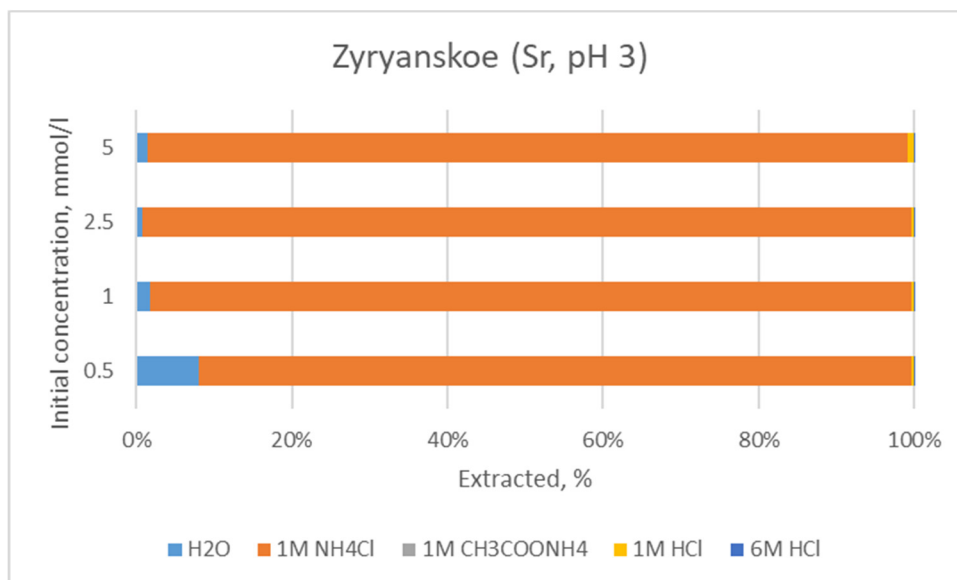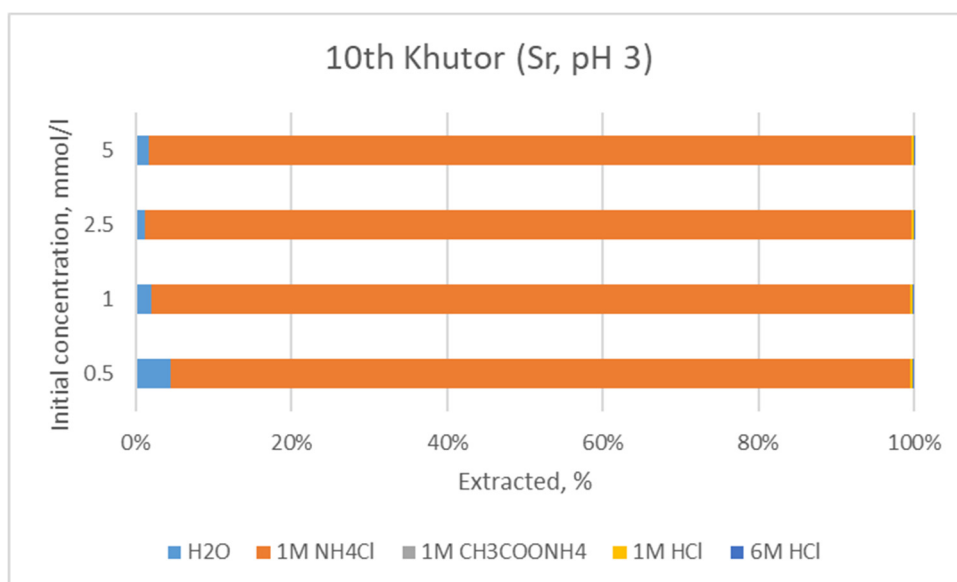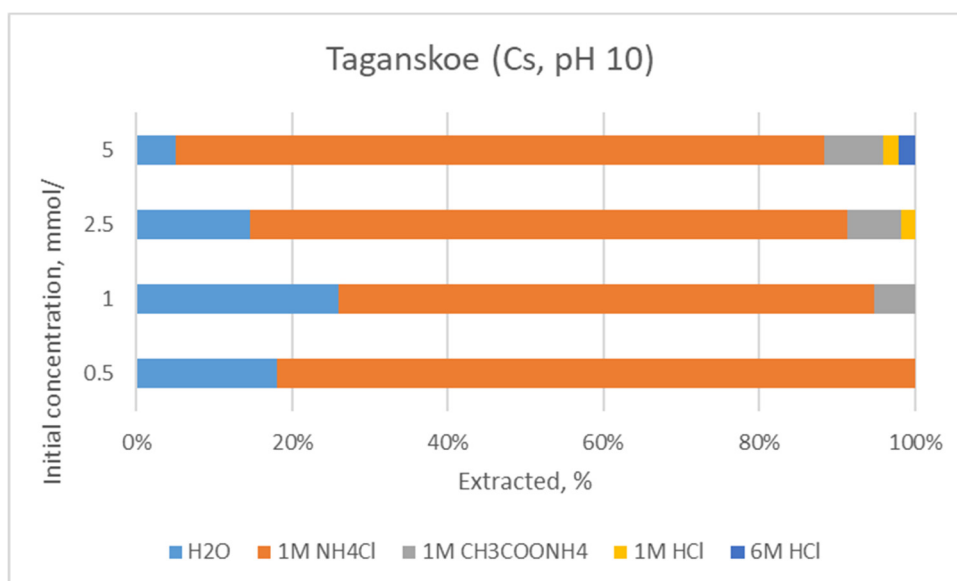

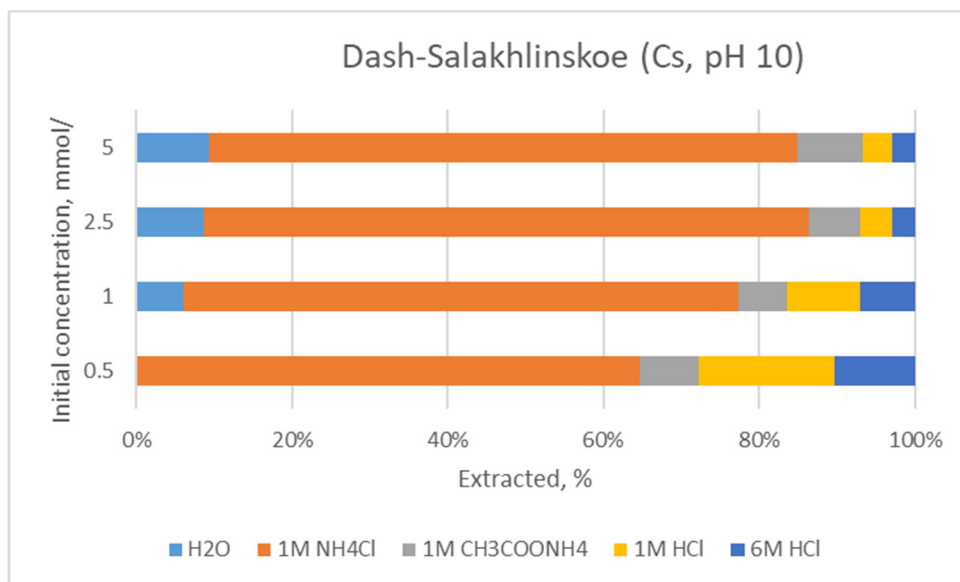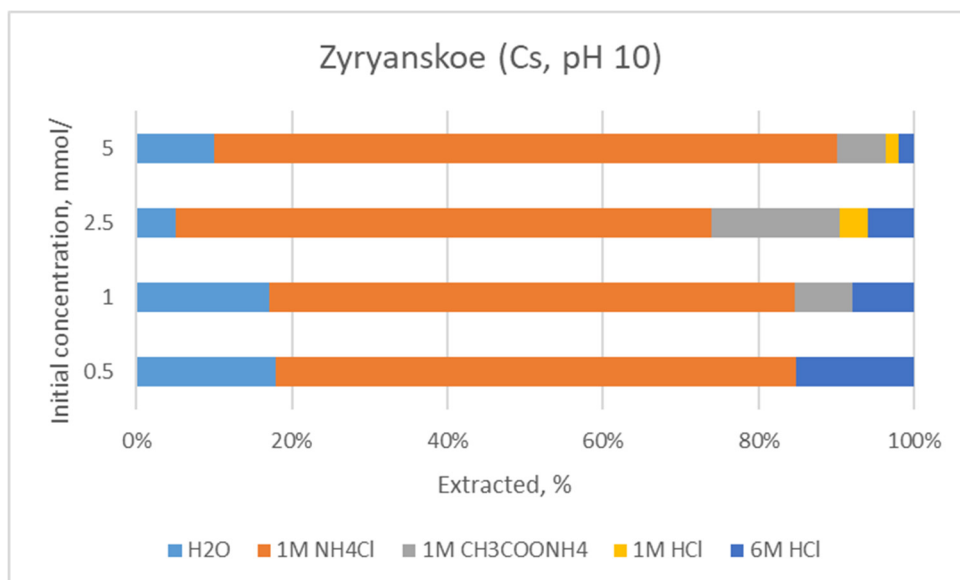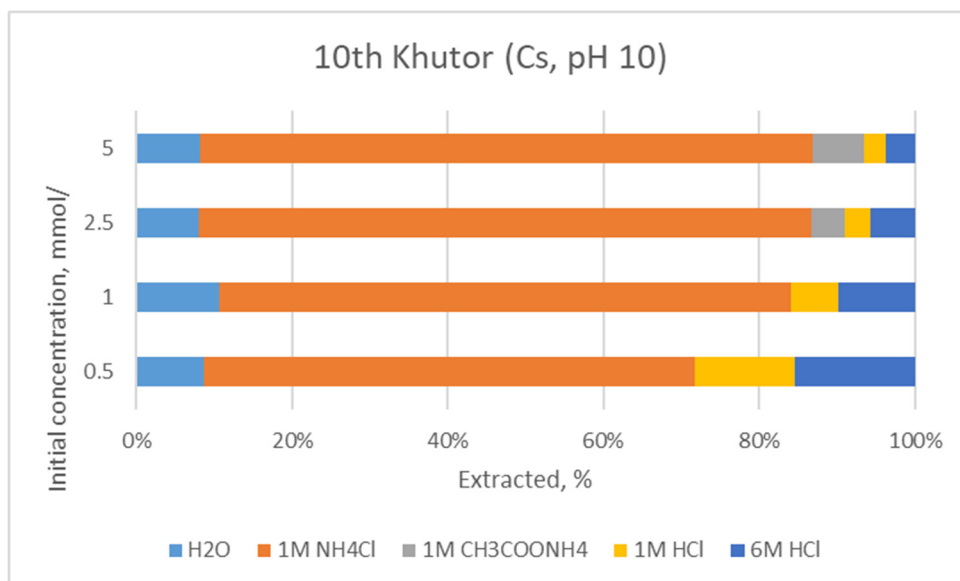

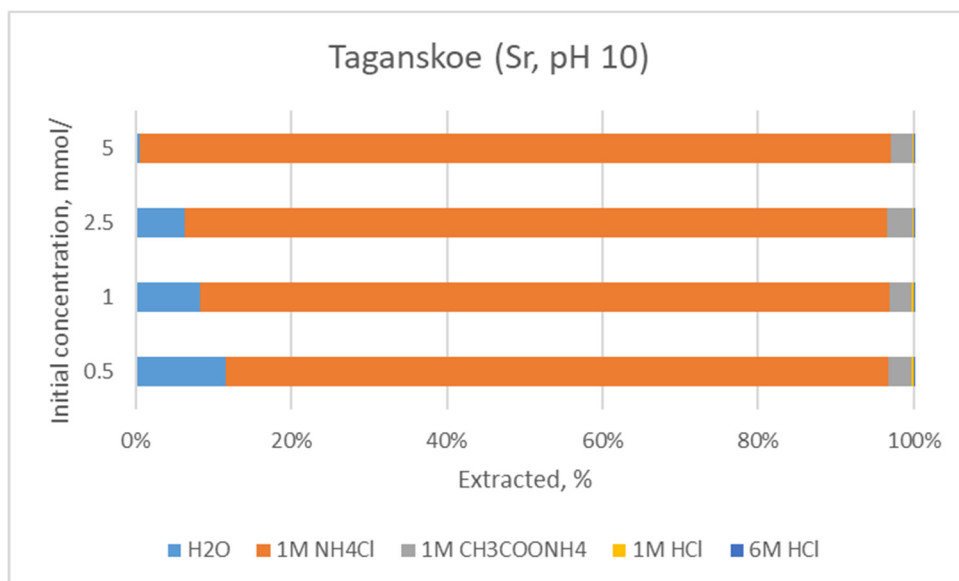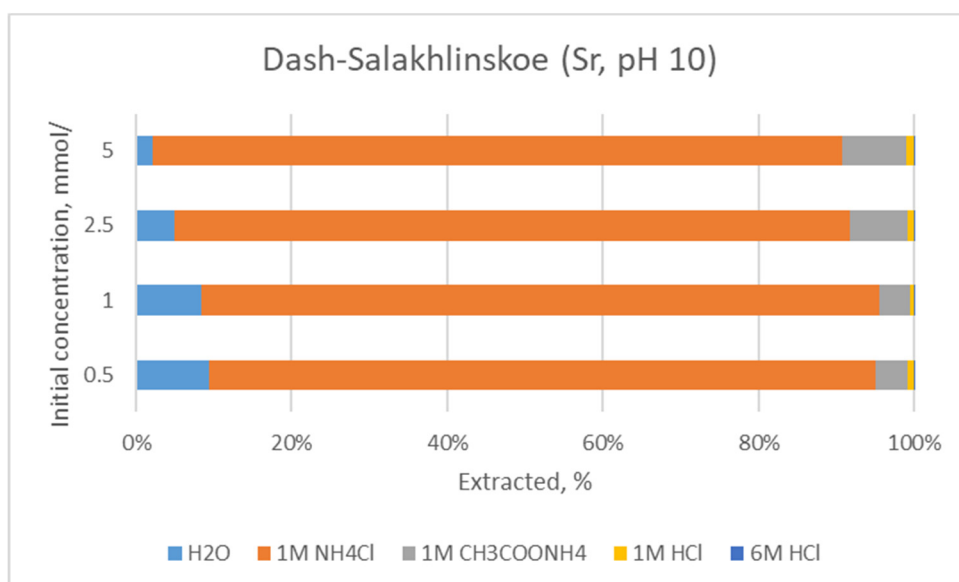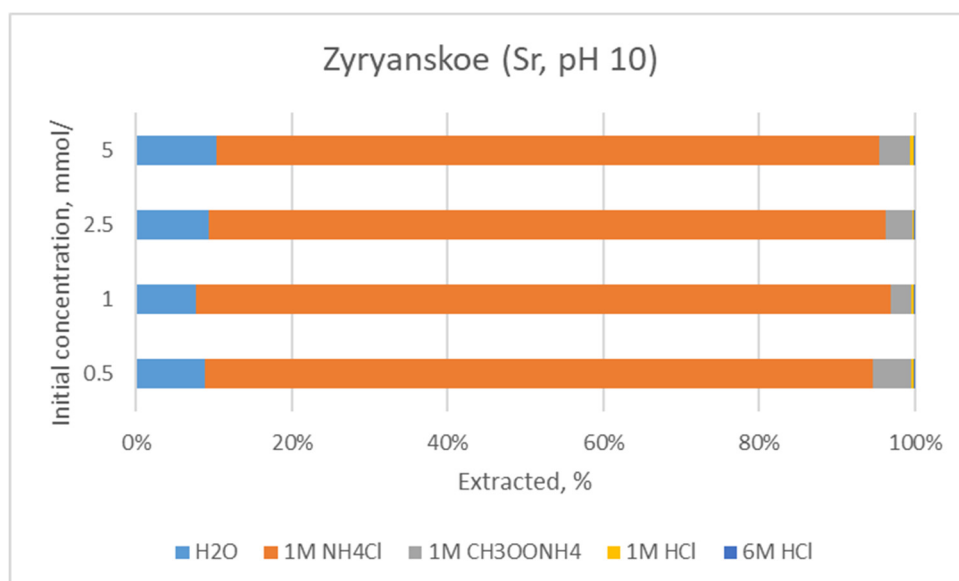

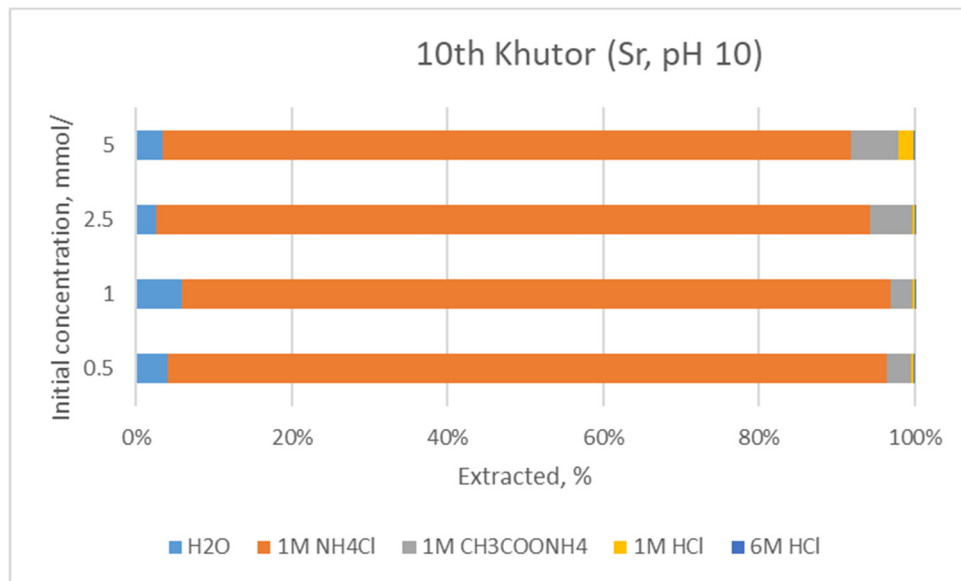

**Figure S1.** Sequential extraction results.
